# Supplementary material
Source: PubMed Central journal article supplement (PMC181571)
Supplement: mbc_14_8_3342__2.pdf [file mbc_14_8_3342__2.pdf]

**Supplementary Table 1. Genome-wide two-hybrid screens using wild type and mutant *DAM1* as baits**

| Categories of the identified proteins | Bait           |               |               | Function                                             |
|---------------------------------------|----------------|---------------|---------------|------------------------------------------------------|
|                                       | Wild type DAM1 | dam1 (S to A) | dam1 (S to D) |                                                      |
| Meiotic SPB-associated                | Ady3           |               |               | Spore wall biosynthesis                              |
|                                       | Spo21          | Spo21         | weak          | Component of the meiotic plaque, spore wall assembly |
| Cell wall structure                   | Ecm11          | Ecm11         | Ecm11         | Cell wall organization and biosynthesis              |
| Nuclear pore                          |                | Nup82         | weak          | Nuclear pore protein                                 |
| RNA                                   | Lcp5           | Lcp5          | Lcp5          | rRNA processing                                      |
|                                       |                |               | Srb7          | RNA polymerase II transcription mediator             |
| Signalling                            | Ste50          | Ste50         | Ste50         | MAP kinase regulator, MAPKKK cascade                 |
|                                       | Mkk2           | Mkk2          |               | MAP kinase kinase                                    |
|                                       |                |               | Bmh1          | RAS signal transduction, pseudohyphal growth         |
| Polarity                              | Kel2           |               | Kel2          | Mating and morphology                                |

|                   |                      |         |         |                                                           |
|-------------------|----------------------|---------|---------|-----------------------------------------------------------|
|                   | Bud6                 | Bud6    | Bud6    | Rho signal transduction, bud site selection               |
| Transcription     | Not5                 | Not5    | Not5    | Negatively regulates transcription of TATA-less promoters |
|                   | Yap7                 | weak    | Yap7    | Transcriptional activator                                 |
| Secretory pathway | Sec34                | Sec34   | Sec34   | ER-Golgi transport                                        |
| Autophagy         | Apg17 <sup>1</sup>   | Apg17   | Apg17   | Autophagy                                                 |
| Unknown           | She1                 | She1    |         | Unknown, null mutant is benomyl sensitive.                |
|                   | Ygl079w <sup>1</sup> | Ygl079w | Ygl079w | Unknown                                                   |

- This table shows Dam1p interacting proteins that are not identified as kinetochore or spindle components.
  - Table notes: “weak” indicates that this protein shows weak interaction with wild type or mutant Dam1p. Blank cell means no interaction.
- <sup>1</sup> Ito, T., Chiba, T., Ozawa, R., Yoshida, M., Hattori, M., and Sakaki, Y. (2001). A comprehensive two-hybrid analysis to explore the yeast protein interactome.

[Comment In: Proc Natl Acad Sci U S A. 2001 Apr 10;98(8):4277-8 UI:

21192614]. Proceedings of the National Academy of Sciences of the United

States of America 98, 4569-4574.

**Supplementary Table 2. Protein interactions of the Dam1 complex identified by two-hybrid and/or *in vitro* binding assays**

| Query Proteins | Interacting Proteins Identified |                   |                                       |
|----------------|---------------------------------|-------------------|---------------------------------------|
|                | by <i>in vitro</i> binding      |                   | by two-hybrid                         |
|                |                                 |                   | genome-wide      direct assay         |
| <b>Dam1</b>    | Dam1                            | Cse4              | Dam1                                  |
|                | Duo1 <sup>5</sup>               | Bim1              | Duo1 <sup>1,2,4,5</sup>               |
|                | Spc34                           | Stu2              | Spc34 <sup>1,4</sup>                  |
|                | Dad4 (vw)                       | Ipl1              | Spc19                                 |
|                | Ndc80                           | Sli15             | Dad1 <sup>1,4</sup>                   |
|                | Ctf19                           | Bir1              | Dad2                                  |
|                | Okp1                            | Mps1              | Ndc80 <sup>1,4</sup>                  |
|                | Mcm22                           | Mad1              | Bim1                                  |
|                | Mcm17                           | Mad3              | Sli15 <sup>1,6</sup>                  |
|                | Ndc10                           | Bub1              | Mcm16 <sup>4</sup>                    |
|                | Ctf13                           | Bub2              |                                       |
|                | Cep3                            |                   |                                       |
|                | <b>Duo1</b>                     | Dam1 <sup>5</sup> |                                       |
| Duo1           |                                 |                   | Spc34 <sup>3,4</sup>                  |
| Spc34          |                                 |                   | Dad1 <sup>2,3,4,5</sup>               |
| Dad1           |                                 |                   | Bim1 <sup>2,4</sup>                   |
| Ask1 (vw)      |                                 |                   | Sli15 <sup>6</sup>                    |
| <b>Spc34</b>   | Dam1                            |                   | Dam1 <sup>1,4</sup>                   |
|                | Duo1                            |                   | Duo1 <sup>3,4</sup>                   |
|                | Spc19                           |                   | Dad1 <sup>3,4</sup>                   |
|                |                                 |                   | Spc19 <sup>2,3,4</sup>                |
|                |                                 |                   | Mcm22 <sup>8</sup>                    |
| <b>Spc19</b>   | Spc34                           |                   | Dam1      Spc19 <sup>7</sup>          |
|                |                                 |                   | Dad2 <sup>3,4</sup> Nuf2 <sup>7</sup> |
|                |                                 |                   | Spc34 <sup>2,3,4</sup>                |
|                |                                 |                   | Ndc80 <sup>2</sup>                    |
| <b>Ask1</b>    | Duo1 (vw)                       |                   | Dad2 <sup>2,3,4</sup>                 |
| <b>Dad1</b>    | Duo1                            |                   | Duo1 <sup>2,3,4</sup>                 |
|                | Dad3                            |                   | Dam1 <sup>1,4</sup>                   |
|                |                                 |                   | Spc34 <sup>3,4</sup>                  |
| <b>Dad2</b>    |                                 |                   | Dam1                                  |
|                |                                 |                   | Spc19 <sup>3,4</sup>                  |
|                |                                 |                   | Ask1 <sup>2,3,4</sup>                 |
| <b>Dad3</b>    | Dad1                            |                   |                                       |
| <b>Dad4</b>    | Dam1 (vw)                       |                   |                                       |

---

|                            |       |       |
|----------------------------|-------|-------|
| <b>Intact Dam1 Complex</b> | Ndc80 | Ndc10 |
|                            | Ctf19 | Ctf13 |
|                            | Okp1  | Cse4  |

---

For the two-hybrid assays, only those interacting proteins that are also kinetochore proteins or that have related functions are included. Genome-wide two-hybrid indicates that the interacting proteins were identified in genome-wide screen against certain baits or in high-throughput screens. Direct assays indicates that the interactions were identified when two specific proteins were tested directly for binding by fusing one protein to a DNA-binding domain and the other protein to an activation domain.

Abbreviations: vw, very weak binding (only ~10% of IVT protein was pulled down by GST-Dam1p); MT, microtubule; SPB, spindle pole body.

Sources of the identified interactions: <sup>1</sup>, this study; <sup>2</sup>, (Uetz *et al.*, 2000); <sup>3</sup>, (Ito *et al.*, 2000); <sup>4</sup>, (Ito *et al.*, 2001); <sup>5</sup>, (Hofmann *et al.*, 1998); <sup>6</sup>, (Kang *et al.*, 2001); <sup>7</sup>, (Newman *et al.*, 2000); <sup>8</sup>, (Measday *et al.*, 2002).

**Supplementary Table 3. Kinetochores protein interactions identified by two-hybrid and/or *in vitro* binding assays**

| Functional category  | Query Proteins | Interacting Proteins Identified |                                                                                      |                                                                                                                                                           |
|----------------------|----------------|---------------------------------|--------------------------------------------------------------------------------------|-----------------------------------------------------------------------------------------------------------------------------------------------------------|
|                      |                | by <i>in vitro</i> binding      | by two-hybrid                                                                        |                                                                                                                                                           |
|                      |                |                                 | genome-wide                                                                          | direct assay                                                                                                                                              |
| <b>Ndc80 complex</b> | <b>Ndc80</b>   | Dam1                            | Dam1 <sup>1,4</sup><br>Nuf2 <sup>4</sup><br>Spc24 <sup>9</sup><br>Spc19 <sup>2</sup> | Nuf2 <sup>7,10</sup><br>Ndc80 <sup>7</sup>                                                                                                                |
|                      | <b>Nuf2</b>    |                                 | Ndc80 <sup>4</sup>                                                                   | Nnf1 <sup>7</sup><br>Spc19 <sup>7</sup><br>Ndc80 <sup>7</sup>                                                                                             |
|                      | <b>Spc24</b>   |                                 | Spc25 <sup>9</sup><br>Ndc80 <sup>9</sup>                                             | Spc24 <sup>7</sup><br>Mcm21 <sup>10</sup>                                                                                                                 |
|                      | <b>Spc25</b>   |                                 | Spc24 <sup>9</sup>                                                                   | Mad1 <sup>7</sup>                                                                                                                                         |
| <b>Ctf19 complex</b> | <b>Ctf19</b>   | Dam1<br>Dam1 complex            |                                                                                      | Ndc10 <sup>11</sup><br>Cep3 <sup>11</sup><br>Cse4 <sup>11</sup><br>Mcm21 <sup>11</sup><br>Okp1 <sup>11</sup>                                              |
|                      | <b>Okp1</b>    | Dam1<br>Dam1 complex            | Ame1 <sup>4</sup>                                                                    | Ctf19 <sup>11</sup><br>Mcm21 <sup>11</sup>                                                                                                                |
|                      | <b>Mcm19</b>   |                                 |                                                                                      | Mcm17 <sup>12</sup>                                                                                                                                       |
|                      | <b>Mcm22</b>   | Dam1                            | Mcm16 <sup>2,4</sup><br>Spc34 <sup>8</sup>                                           |                                                                                                                                                           |
|                      | <b>Mcm17</b>   | Dam1                            | Mif2 <sup>24</sup>                                                                   | Mmc19 <sup>12</sup>                                                                                                                                       |
|                      | <b>Mcm21</b>   |                                 |                                                                                      | Okp1 <sup>11</sup><br>Ctf19 <sup>11</sup><br>Mcm21 <sup>11</sup><br>Mif2 <sup>11</sup><br>Cbf1 <sup>11</sup><br>Skp1 <sup>11</sup><br>Spc24 <sup>10</sup> |
|                      | <b>Mcm16</b>   |                                 | Dam1 <sup>4</sup><br>Mcm16 <sup>4</sup><br>Mcm22 <sup>2,4</sup>                      |                                                                                                                                                           |
|                      | <b>Mtw1</b>    |                                 |                                                                                      |                                                                                                                                                           |
|                      | <b>Ame1</b>    | (nd)                            |                                                                                      | Okp1 <sup>4</sup>                                                                                                                                         |
|                      | <b>Ctf3</b>    | (nd)                            |                                                                                      | Mcm22 <sup>8</sup>                                                                                                                                        |
|                      | <b>Nkp1</b>    | (nd)                            |                                                                                      | Nkp2 <sup>2</sup>                                                                                                                                         |
|                      | <b>Nkp2</b>    | (nd)                            |                                                                                      | Nkp1 <sup>2</sup>                                                                                                                                         |

|                                                                             |              |                                            |                                                               |                                                                                        |
|-----------------------------------------------------------------------------|--------------|--------------------------------------------|---------------------------------------------------------------|----------------------------------------------------------------------------------------|
| <b>CBF3 complex</b>                                                         | <b>Ndc10</b> | Dam1<br>Dam1 complex<br>Cbf1 <sup>15</sup> |                                                               | Bir1 <sup>13</sup><br>Ctf19 <sup>11</sup>                                              |
|                                                                             | <b>Ctf13</b> | Dam1<br>Dam1 complex<br>Cbf1 <sup>15</sup> | Skp1 <sup>2</sup>                                             | Bir1 <sup>13</sup>                                                                     |
|                                                                             | <b>Cep3</b>  | Dam1 (w)<br>Cbf1 <sup>15</sup>             |                                                               | Bir1 <sup>13</sup><br>Cep3<br>Ctf19 <sup>11</sup>                                      |
|                                                                             | <b>Skp1</b>  |                                            | Ctf13 <sup>2</sup>                                            | Bir1 <sup>13</sup><br>Mcm21 <sup>11</sup>                                              |
| <b>DNA Binding</b>                                                          | <b>Cse4</b>  | Dam1<br>Dam1 complex                       |                                                               | Ctf19 <sup>11,16</sup>                                                                 |
|                                                                             | <b>Cbf1</b>  |                                            | Cbf1 <sup>14</sup><br>Mcm21 <sup>11</sup>                     | Ndc10 <sup>15</sup><br>Cep3 <sup>15</sup><br>Ctf13 <sup>15</sup><br>Mif2 <sup>15</sup> |
|                                                                             | <b>Mif2</b>  | (nd)<br>Cbf1 <sup>15</sup>                 |                                                               | Mcm21 <sup>11</sup>                                                                    |
| <b>Kineto-<br/>chore<br/>spindle-<br/>associated<br/>proteins</b>           | <b>Bim1</b>  | Dam1<br>MT <sup>27</sup>                   | Dam1 <sup>1</sup><br>Duo1 <sup>2,4</sup><br>Bik1 <sup>4</sup> | Tub1 <sup>17</sup><br>Tub3 <sup>17</sup>                                               |
|                                                                             | <b>Bik1</b>  |                                            | Bim1 <sup>4</sup><br>Stu2 <sup>4</sup>                        | Tub1 <sup>17</sup><br>Kip2 <sup>7</sup>                                                |
|                                                                             | <b>Stu2</b>  | Dam1<br>MT <sup>19</sup>                   | Bik1 <sup>4</sup>                                             | Stu2 <sup>18</sup>                                                                     |
|                                                                             | <b>Cin8</b>  | (nd)                                       |                                                               | Cin8 <sup>7</sup><br>Nuf2 <sup>7</sup>                                                 |
| <b>Ipl1 Complex</b>                                                         | <b>Ipl1</b>  | Dam1<br>MT <sup>6</sup>                    | Sli15 <sup>6</sup>                                            |                                                                                        |
|                                                                             | <b>Sli15</b> | Dam1<br>MT <sup>6</sup>                    | Ipl1 <sup>6</sup><br>Duo1 <sup>6</sup>                        | Dam1 <sup>6</sup>                                                                      |
|                                                                             | <b>Bir1</b>  | Dam1                                       |                                                               | Ndc10 <sup>13</sup><br>Cep3 <sup>13</sup><br>Ctf13 <sup>13</sup><br>Skp1 <sup>13</sup> |
| <b>Check-<br/>point<br/>Proteins<br/>(kineto-<br/>chore<br/>associated)</b> | <b>Mps1</b>  | Dam1                                       |                                                               | Stu1 <sup>20</sup>                                                                     |
|                                                                             | <b>Mad1</b>  | Dam1                                       |                                                               | Mad1<br>Spc25 <sup>7</sup><br>Cdc20 <sup>21</sup>                                      |
|                                                                             | <b>Mad2</b>  |                                            |                                                               | Cdc20 <sup>21</sup>                                                                    |

|                         |              |      |                                        |                                         |
|-------------------------|--------------|------|----------------------------------------|-----------------------------------------|
|                         | <b>Mad3</b>  | Dam1 | Bub3 <sup>2</sup><br>Cln3 <sup>2</sup> | Cdc20 <sup>21</sup>                     |
|                         | <b>Bub1</b>  | Dam1 | Bub3 <sup>4</sup>                      | Bub3 <sup>23</sup>                      |
|                         | <b>Bub3</b>  |      | Bub1 <sup>4</sup><br>Mad3 <sup>2</sup> | Mad3 <sup>22</sup>                      |
| <b>(SPB-associated)</b> | <b>Bub2</b>  | Dam1 |                                        |                                         |
|                         | <b>Slk19</b> |      |                                        | Slk19 <sup>7</sup>                      |
|                         | <b>Nnf1</b>  | (nd) |                                        | Ndc80 <sup>7</sup><br>Nuf2 <sup>7</sup> |
|                         | <b>Dsn1</b>  | (nd) |                                        |                                         |
|                         | <b>Nsl1</b>  | (nd) |                                        |                                         |

41 kinetochore proteins and their interacting partners are listed. Interacting proteins are identified either by *in vitro* binding or by two-hybrid assays, or both. In the binding assays, the kinetochore proteins were tested for their interactions with Dam1p, except in those cases in which they have not been determined (nd). For the two-hybrid assays, only those interacting proteins that are also kinetochore proteins or that have related functions are included. Genome-wide two-hybrid indicates that the interacting proteins were identified in genome-wide screen against certain baits or in high-throughput screens. Direct assay indicates that the interactions are found when two specific proteins were tested directly for binding by fusing one protein to a DNA-binding domain and the other protein to an activation domain.

- Abbreviations: w, weak binding (only ~20% of IVT protein was pulled down by GST-Dam1p); vw, very weak binding (only ~10% of IVT protein was pulled down by GST-Dam1p); MT, microtubule; SPB, spindle pole body.
- Sources of the identified interactions are referenced: <sup>1</sup>, This study; <sup>2</sup>, (Uetz *et al.*, 2000); <sup>3</sup>, (Ito *et al.*, 2000); <sup>4</sup>, (Ito *et al.*, 2001); <sup>5</sup>, (Hofmann *et al.*, 1998); <sup>6</sup>, (Kang *et al.*, 2001); <sup>7</sup>, (Newman *et al.*, 2000); <sup>8</sup>, (Measday *et al.*, 2002); <sup>9</sup>, (Cho *et al.*, 1998); <sup>10</sup>, (Janke *et al.*, 2001); <sup>11</sup>, (Ortiz *et al.*, 1999); <sup>12</sup>, (Ghosh *et al.*, 2001); <sup>13</sup>, (Yoon and Carbon, 1999); <sup>14</sup>, (Dowell *et al.*, 1992); <sup>15</sup>, (Hemmerich *et al.*, 2000); <sup>16</sup>, (Chen *et al.*, 2000); <sup>17</sup>, (Schwartz *et al.*, 1997); <sup>18</sup>, (Chen *et al.*, 1998); <sup>19</sup>, (Wang and Huffaker, 1997); <sup>20</sup>, (Jones *et al.*, 1999); <sup>21</sup>, (Hwang *et al.*, 1998); <sup>22</sup>, (Hardwick *et al.*, 2000); <sup>23</sup>, (Roberts *et al.*, 1994); <sup>24</sup>, (Pot *et al.*, 2003)
